# Supplementary material for: Application of AI-Based Techniques on Moody’s Diagram for Predicting Friction Factor in Pipe Flow
Source: MDPI journal article supplement (doi:10.3390/j6040036), 2023-10-07
Supplement: s1 [file s1]

## Appendices

The distribution of REPTree in the form of tree manner taking two different parameters are shown in Figure S1 for approach-2. Likewise, the Random tree and M5P distribution of approach-2 is shown in Figure S2 and S3. It shows the basic principle of tree distribution system to capture the variations and predict most accurate results.

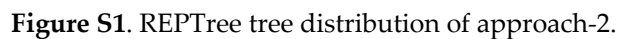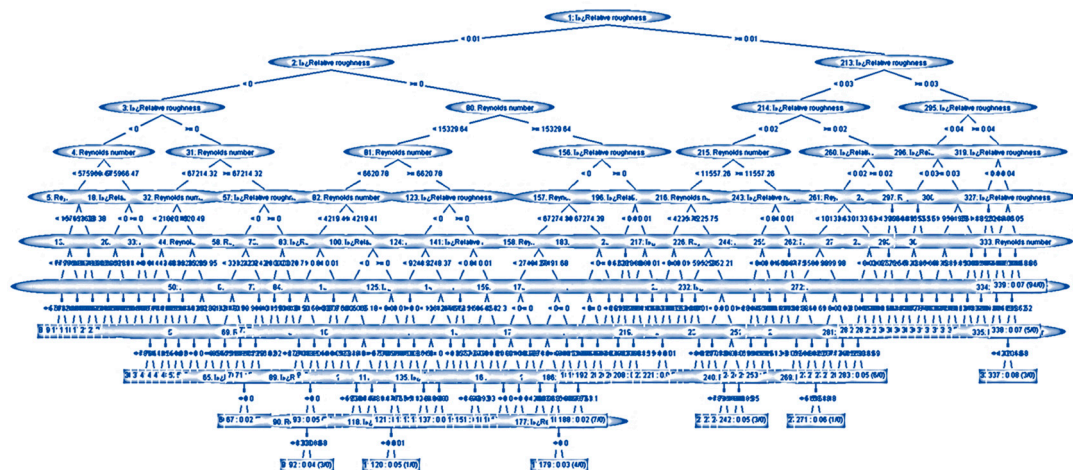

**Figure S2.** Random Tree distribution of approach-2.

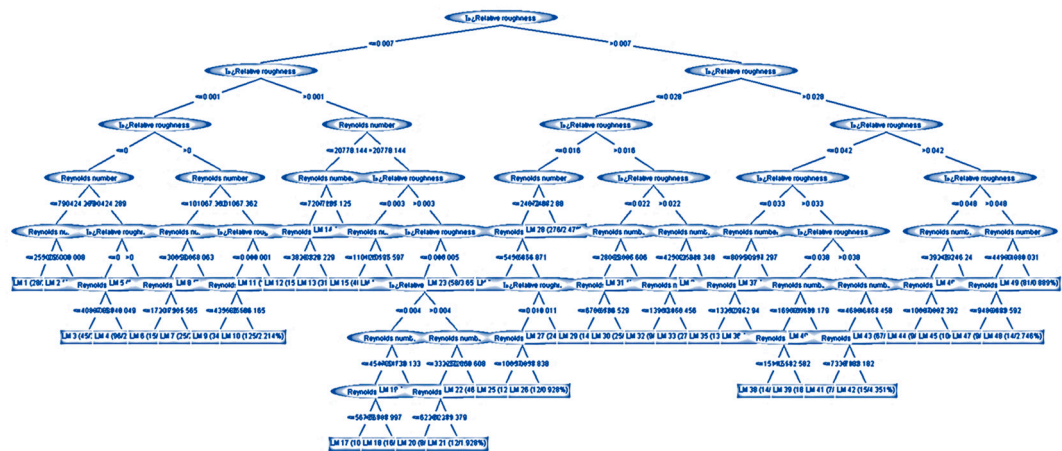

**Figure. S3.** M5P distribution of approach-2.

## B) Comparison of Approach-1 Results

The training and testing datasets of approach-1 are compared with the expression given by [8] for turbulent region. It shows most accurate results with a relative error of  $\pm 1\%$  in Figure S4. Taylor diagram represents correlation coefficients (CC) along with standard deviation of all the datasets. From Taylor diagram also similar kind of results are obtained. Simulated results from expression given by [8] predicted more accurate results as compared to all AI based models in Figure S5.

From this figure it can be concluded that the expression given by [8] predicts more accurate results as compared to AI tools. Another aspect comparison is relative error of observed and predicted datasets. Thus, relative error of all the predicted datasets from different AI models as well as analytical approaches are shown in Figure S6. Figure S6(a) displays that RF, RT, REPTree gives a relative error of  $\pm 10\%$  whereas expression given by [8] shows a relative error within  $\pm 1\%$  during training. Likewise, Figure S6(b) displays relative error of testing datasets of all models, where RF model shows relative error of  $\pm 20\%$ . But expression given by [8] shows a consistent result of relative error within  $\pm 1\%$  during training as well as testing.

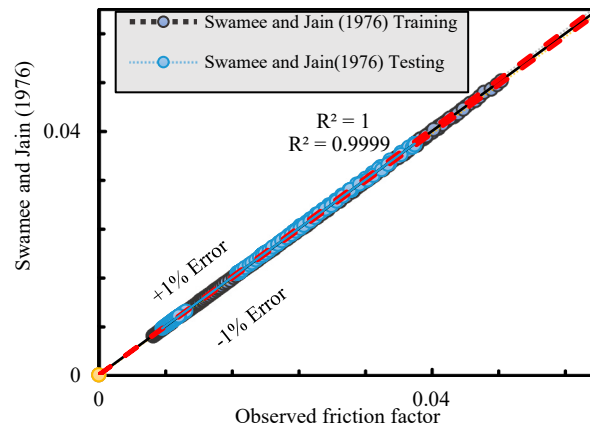

**Figure. S4** Agreement diagram of observed and predicted friction factor of training and testing dataset of approach-1 by using expression of [8].

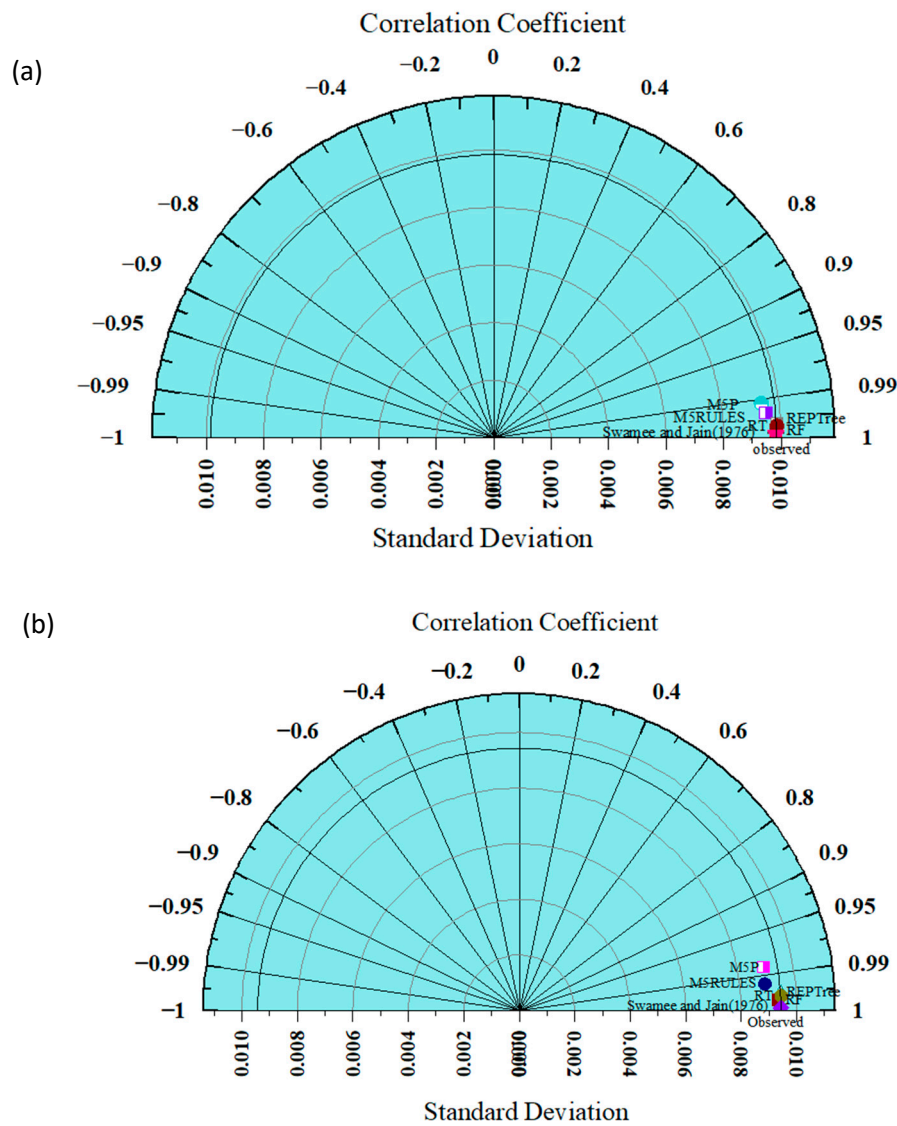

**Figure. S5** Taylor diagram of approach-1 (a) Training; (b) Testing.

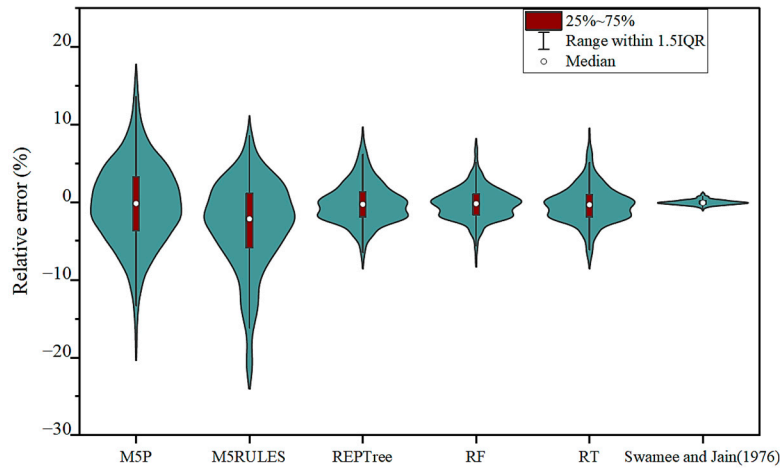

(a)

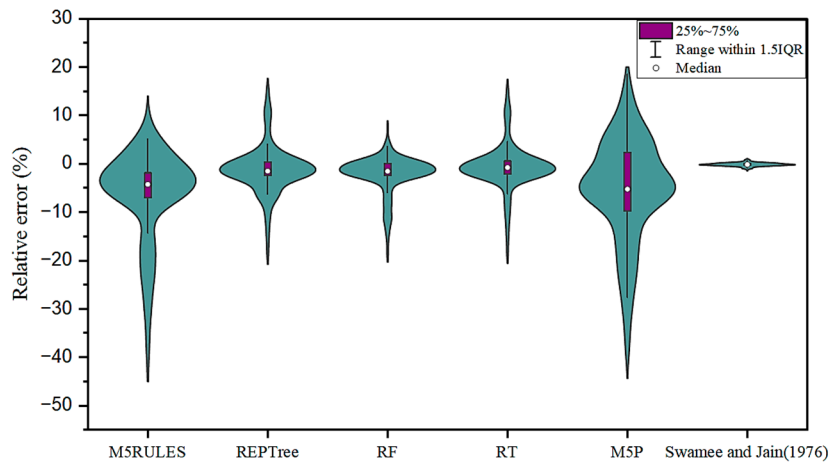

(b)

**Figure. S6** Violin error box diagram of approach-1 (a) Training; (b) Testing.

## C) Tree Distribution and Expressions

The distribution of REPTree and M5P distribution in the form of tree manner taking two different parameters are shown in Table S1 for approach-2. Likewise, the expressions to predict friction factor by using M5p and M5Rules of approach-2 is shown in Table S3 and S4. A number of linear expressions are given by M5p and M5Rules to predict friction factor.

**Table S1.** REPTree distribution system of approach-2.

| Distribution of REPTree   |                                               |
|---------------------------|-----------------------------------------------|
| Relative roughness < 0.01 |                                               |
|                           | Relative roughness < 0                        |
|                           | Relative roughness < 0                        |
|                           | Reynolds number < 725848.75                   |
|                           | Reynolds number < 162744.16                   |
|                           | Reynolds number < 73437.92 : 0.02 (4/0) [2/0] |

---

|  |  |  |  |  |                                                    |
|--|--|--|--|--|----------------------------------------------------|
|  |  |  |  |  | Reynolds number >= 73437.92                        |
|  |  |  |  |  | Reynolds number < 106294.26 : 0.02 (2/0) [2/0]     |
|  |  |  |  |  | Reynolds number >= 106294.26 : 0.02 (6/0) [2/0]    |
|  |  |  |  |  | Reynolds number >= 162744.16                       |
|  |  |  |  |  | Reynolds number < 352410.66 : 0.02 (9/0) [10/0]    |
|  |  |  |  |  | Reynolds number >= 352410.66 : 0.01 (17/0) [11/0]  |
|  |  |  |  |  | Reynolds number >= 725848.75                       |
|  |  |  |  |  | Relative roughness < 0                             |
|  |  |  |  |  | Reynolds number < 3052891.44                       |
|  |  |  |  |  | Reynolds number < 1305447.66 : 0.01 (8/0) [5/0]    |
|  |  |  |  |  | Reynolds number >= 1305447.66 : 0.01 (15/0) [10/0] |
|  |  |  |  |  | Reynolds number >= 3052891.44 : 0.01 (75/0) [30/0] |
|  |  |  |  |  | Relative roughness >= 0                            |
|  |  |  |  |  | Relative roughness < 0                             |
|  |  |  |  |  | Reynolds number < 4248853.13 : 0.01 (12/0) [4/0]   |
|  |  |  |  |  | Reynolds number >= 4248853.13 : 0.01 (25/0) [11/0] |
|  |  |  |  |  | Relative roughness >= 0 : 0.01 (44/0) [19/0]       |
|  |  |  |  |  | Relative roughness >= 0                            |
|  |  |  |  |  | Reynolds number < 66028.3                          |
|  |  |  |  |  | Reynolds number < 20559.74                         |
|  |  |  |  |  | Reynolds number < 11878.86                         |
|  |  |  |  |  | Reynolds number < 8915.7 : 0.03 (3/0) [0/0]        |
|  |  |  |  |  | Reynolds number >= 8915.7 : 0.03 (2/0) [2/0]       |
|  |  |  |  |  | Reynolds number >= 11878.86                        |
|  |  |  |  |  | Reynolds number < 13822.72 : 0.03 (2/0) [0/0]      |
|  |  |  |  |  | Reynolds number >= 13822.72 : 0.03 (5/0) [7/0]     |
|  |  |  |  |  | Reynolds number >= 20559.74                        |
|  |  |  |  |  | Reynolds number < 35269.95                         |
|  |  |  |  |  | Reynolds number < 29041.19                         |
|  |  |  |  |  | Relative roughness < 0 : 0.03 (3/0) [2/0]          |
|  |  |  |  |  | Relative roughness >= 0 : 0.03 (9/0) [3/0]         |
|  |  |  |  |  | Reynolds number >= 29041.19 : 0.02 (6/0) [3/0]     |
|  |  |  |  |  | Reynolds number >= 35269.95                        |
|  |  |  |  |  | Relative roughness < 0                             |
|  |  |  |  |  | Reynolds number < 49004.56 : 0.02 (5/0) [4/0]      |
|  |  |  |  |  | Reynolds number >= 49004.56 : 0.02 (6/0) [2/0]     |
|  |  |  |  |  | Relative roughness >= 0                            |
|  |  |  |  |  | Reynolds number < 49600 : 0.02 (6/0) [2/0]         |
|  |  |  |  |  | Reynolds number >= 49600 : 0.02 (4/0) [2/0]        |
|  |  |  |  |  | Reynolds number >= 66028.3                         |
|  |  |  |  |  | Relative roughness < 0                             |
|  |  |  |  |  | Reynolds number < 374102.5                         |
|  |  |  |  |  | Reynolds number < 119170.99 : 0.02 (14/0) [0/0]    |
|  |  |  |  |  | Reynolds number >= 119170.99                       |
|  |  |  |  |  | Reynolds number < 172624.1 : 0.02 (5/0) [4/0]      |
|  |  |  |  |  | Reynolds number >= 172624.1 : 0.02 (11/0) [6/0]    |
|  |  |  |  |  | Reynolds number >= 374102.5                        |
|  |  |  |  |  | Relative roughness < 0 : 0.01 (43/0) [21/0]        |
|  |  |  |  |  | Relative roughness >= 0 : 0.02 (38/0) [26/0]       |
|  |  |  |  |  | Relative roughness >= 0                            |
|  |  |  |  |  | Reynolds number < 249284.61                        |

---

---

|  |  |  |  |  |  |                                                   |
|--|--|--|--|--|--|---------------------------------------------------|
|  |  |  |  |  |  | Reynolds number < 123657.3 : 0.02 (11/0) [2/0]    |
|  |  |  |  |  |  | Reynolds number >= 123657.3 : 0.02 (8/0) [5/0]    |
|  |  |  |  |  |  | Reynolds number >= 249284.61 : 0.02 (73/0) [50/0] |
|  |  |  |  |  |  | Relative roughness >= 0                           |
|  |  |  |  |  |  | Reynolds number < 14974.27                        |
|  |  |  |  |  |  | Reynolds number < 6620.78                         |
|  |  |  |  |  |  | Reynolds number < 4219.41                         |
|  |  |  |  |  |  | Relative roughness < 0.01                         |
|  |  |  |  |  |  | Reynolds number < 3150.68 : 0.05 (3/0) [2/0]      |
|  |  |  |  |  |  | Reynolds number >= 3150.68                        |
|  |  |  |  |  |  | Reynolds number < 3805.11 : 0.04 (5/0) [2/0]      |
|  |  |  |  |  |  | Reynolds number >= 3805.11 : 0.04 (2/0) [0/0]     |
|  |  |  |  |  |  | Relative roughness >= 0.01 : 0.05 (7/0) [0/0]     |
|  |  |  |  |  |  | Reynolds number >= 4219.41                        |
|  |  |  |  |  |  | Relative roughness < 0 : 0.04 (12/0) [3/0]        |
|  |  |  |  |  |  | Relative roughness >= 0 : 0.04 (13/0) [0/0]       |
|  |  |  |  |  |  | Reynolds number >= 6620.78                        |
|  |  |  |  |  |  | Relative roughness < 0                            |
|  |  |  |  |  |  | Reynolds number < 9248.37                         |
|  |  |  |  |  |  | Relative roughness < 0 : 0.03 (5/0) [0/0]         |
|  |  |  |  |  |  | Relative roughness >= 0 : 0.04 (3/0) [4/0]        |
|  |  |  |  |  |  | Reynolds number >= 9248.37                        |
|  |  |  |  |  |  | Reynolds number < 12612.74                        |
|  |  |  |  |  |  | Relative roughness < 0 : 0.03 (2/0) [2/0]         |
|  |  |  |  |  |  | Relative roughness >= 0                           |
|  |  |  |  |  |  | Relative roughness < 0 : 0.03 (6/0) [1/0]         |
|  |  |  |  |  |  | Relative roughness >= 0 : 0.03 (3/0) [0/0]        |
|  |  |  |  |  |  | Reynolds number >= 12612.74 : 0.03 (3/0) [4/0]    |
|  |  |  |  |  |  | Relative roughness >= 0                           |
|  |  |  |  |  |  | Reynolds number < 9542.3                          |
|  |  |  |  |  |  | Relative roughness < 0.01 : 0.04 (2/0) [3/0]      |
|  |  |  |  |  |  | Relative roughness >= 0.01 : 0.04 (6/0) [0/0]     |
|  |  |  |  |  |  | Reynolds number >= 9542.3                         |
|  |  |  |  |  |  | Relative roughness < 0.01 : 0.04 (3/0) [0/0]      |
|  |  |  |  |  |  | Relative roughness >= 0.01                        |
|  |  |  |  |  |  | Relative roughness < 0.01 : 0.04 (4/0) [0/0]      |
|  |  |  |  |  |  | Relative roughness >= 0.01 : 0.04 (2/0) [1/0]     |
|  |  |  |  |  |  | Reynolds number >= 14974.27                       |
|  |  |  |  |  |  | Relative roughness < 0                            |
|  |  |  |  |  |  | Reynolds number < 39861.81                        |
|  |  |  |  |  |  | Reynolds number < 23623.94                        |
|  |  |  |  |  |  | Relative roughness < 0 : 0.03 (6/0) [4/0]         |
|  |  |  |  |  |  | Relative roughness >= 0                           |
|  |  |  |  |  |  | Relative roughness < 0 : 0.03 (3/0) [1/0]         |
|  |  |  |  |  |  | Relative roughness >= 0 : 0.03 (2/0) [2/0]        |
|  |  |  |  |  |  | Reynolds number >= 23623.94                       |
|  |  |  |  |  |  | Relative roughness < 0                            |
|  |  |  |  |  |  | Relative roughness < 0 : 0.03 (8/0) [2/0]         |
|  |  |  |  |  |  | Relative roughness >= 0 : 0.03 (3/0) [2/0]        |
|  |  |  |  |  |  | Relative roughness >= 0 : 0.03 (3/0) [3/0]        |
|  |  |  |  |  |  | Reynolds number >= 39861.81                       |

---

---

|  |  |  |  |  |                                                   |
|--|--|--|--|--|---------------------------------------------------|
|  |  |  |  |  | Relative roughness < 0                            |
|  |  |  |  |  | Reynolds number < 101748.5                        |
|  |  |  |  |  | Reynolds number < 47909.23 : 0.03 (3/0) [0/0]     |
|  |  |  |  |  | Reynolds number >= 47909.23 : 0.02 (9/0) [5/0]    |
|  |  |  |  |  | Reynolds number >= 101748.5                       |
|  |  |  |  |  | Relative roughness < 0                            |
|  |  |  |  |  | Reynolds number < 326868.47 : 0.02 (9/0) [2/0]    |
|  |  |  |  |  | Reynolds number >= 326868.47 : 0.02 (37/0) [15/0] |
|  |  |  |  |  | Relative roughness >= 0 : 0.02 (34/0) [25/0]      |
|  |  |  |  |  | Relative roughness >= 0                           |
|  |  |  |  |  | Relative roughness < 0                            |
|  |  |  |  |  | Reynolds number < 187974.55 : 0.03 (8/0) [4/0]    |
|  |  |  |  |  | Reynolds number >= 187974.55 : 0.02 (41/0) [14/0] |
|  |  |  |  |  | Relative roughness >= 0 : 0.03 (44/0) [17/0]      |
|  |  |  |  |  | Relative roughness >= 0                           |
|  |  |  |  |  | Relative roughness < 0.01                         |
|  |  |  |  |  | Reynolds number < 65848.6                         |
|  |  |  |  |  | Reynolds number < 27583.27 : 0.03 (3/0) [3/0]     |
|  |  |  |  |  | Reynolds number >= 27583.27 : 0.03 (3/0) [3/0]    |
|  |  |  |  |  | Reynolds number >= 65848.6 : 0.03 (34/0) [24/0]   |
|  |  |  |  |  | Relative roughness >= 0.01                        |
|  |  |  |  |  | Relative roughness < 0.01                         |
|  |  |  |  |  | Reynolds number < 36700.24 : 0.04 (4/0) [2/0]     |
|  |  |  |  |  | Reynolds number >= 36700.24 : 0.03 (38/0) [17/0]  |
|  |  |  |  |  | Relative roughness >= 0.01                        |
|  |  |  |  |  | Reynolds number < 37163.68 : 0.04 (6/0) [0/0]     |
|  |  |  |  |  | Reynolds number >= 37163.68 : 0.04 (39/0) [18/0]  |
|  |  |  |  |  | Relative roughness >= 0.01                        |
|  |  |  |  |  | Relative roughness < 0.03                         |
|  |  |  |  |  | Relative roughness < 0.02                         |
|  |  |  |  |  | Reynolds number < 7992.64                         |
|  |  |  |  |  | Reynolds number < 5203.86                         |
|  |  |  |  |  | Reynolds number < 3332.97 : 0.05 (2/0) [1/0]      |
|  |  |  |  |  | Reynolds number >= 3332.97 : 0.05 (5/0) [7/0]     |
|  |  |  |  |  | Reynolds number >= 5203.86                        |
|  |  |  |  |  | Relative roughness < 0.01                         |
|  |  |  |  |  | Reynolds number < 6318.47 : 0.05 (3/0) [0/0]      |
|  |  |  |  |  | Reynolds number >= 6318.47 : 0.05 (2/0) [2/0]     |
|  |  |  |  |  | Relative roughness >= 0.01 : 0.05 (2/0) [3/0]     |
|  |  |  |  |  | Reynolds number >= 7992.64                        |
|  |  |  |  |  | Relative roughness < 0.01                         |
|  |  |  |  |  | Relative roughness < 0.01                         |
|  |  |  |  |  | Reynolds number < 18342.68                        |
|  |  |  |  |  | Reynolds number < 11153.65 : 0.04 (2/0) [1/0]     |
|  |  |  |  |  | Reynolds number >= 11153.65 : 0.04 (3/0) [0/0]    |
|  |  |  |  |  | Reynolds number >= 18342.68 : 0.04 (36/0) [28/0]  |
|  |  |  |  |  | Relative roughness >= 0.01                        |
|  |  |  |  |  | Reynolds number < 33373.13                        |
|  |  |  |  |  | Reynolds number < 16251.13 : 0.05 (3/0) [3/0]     |
|  |  |  |  |  | Reynolds number >= 16251.13 : 0.04 (2/0) [3/0]    |
|  |  |  |  |  | Reynolds number >= 33373.13 : 0.04 (42/0) [35/0]  |

---

---

|  |  |  |  |                                                  |
|--|--|--|--|--------------------------------------------------|
|  |  |  |  | Relative roughness >= 0.01                       |
|  |  |  |  | Reynolds number < 71961.12                       |
|  |  |  |  | Reynolds number < 21950.8 : 0.05 (3/0) [4/0]     |
|  |  |  |  | Reynolds number >= 21950.8 : 0.04 (8/0) [2/0]    |
|  |  |  |  | Reynolds number >= 71961.12 : 0.04 (44/0) [23/0] |
|  |  |  |  | Relative roughness >= 0.02                       |
|  |  |  |  | Relative roughness < 0.02                        |
|  |  |  |  | Reynolds number < 10133.63                       |
|  |  |  |  | Reynolds number < 5599.98                        |
|  |  |  |  | Reynolds number < 3814.69 : 0.06 (3/0) [1/0]     |
|  |  |  |  | Reynolds number >= 3814.69 : 0.06 (4/0) [2/0]    |
|  |  |  |  | Reynolds number >= 5599.98                       |
|  |  |  |  | Relative roughness < 0.02 : 0.05 (3/0) [3/0]     |
|  |  |  |  | Relative roughness >= 0.02                       |
|  |  |  |  | Reynolds number < 7617.7 : 0.05 (2/0) [0/0]      |
|  |  |  |  | Reynolds number >= 7617.7 : 0.05 (2/0) [1/0]     |
|  |  |  |  | Reynolds number >= 10133.63                      |
|  |  |  |  | Relative roughness < 0.02                        |
|  |  |  |  | Reynolds number < 27337.03                       |
|  |  |  |  | Reynolds number < 14569.34 : 0.05 (3/0) [1/0]    |
|  |  |  |  | Reynolds number >= 14569.34 : 0.05 (3/0) [2/0]   |
|  |  |  |  | Reynolds number >= 27337.03 : 0.05 (54/0) [18/0] |
|  |  |  |  | Relative roughness >= 0.02                       |
|  |  |  |  | Reynolds number < 28094.96 : 0.05 (5/0) [4/0]    |
|  |  |  |  | Reynolds number >= 28094.96 : 0.05 (52/0) [22/0] |
|  |  |  |  | Relative roughness >= 0.02                       |
|  |  |  |  | Reynolds number < 13960.46                       |
|  |  |  |  | Reynolds number < 7071.75 : 0.06 (3/0) [1/0]     |
|  |  |  |  | Reynolds number >= 7071.75 : 0.06 (4/0) [1/0]    |
|  |  |  |  | Reynolds number >= 13960.46 : 0.05 (48/0) [29/0] |
|  |  |  |  | Relative roughness >= 0.03                       |
|  |  |  |  | Relative roughness < 0.04                        |
|  |  |  |  | Relative roughness < 0.03                        |
|  |  |  |  | Reynolds number < 12199.29                       |
|  |  |  |  | Reynolds number < 4820.65 : 0.06 (3/0) [2/0]     |
|  |  |  |  | Reynolds number >= 4820.65 : 0.06 (7/0) [0/0]    |
|  |  |  |  | Reynolds number >= 12199.29 : 0.06 (60/0) [24/0] |
|  |  |  |  | Relative roughness >= 0.03                       |
|  |  |  |  | Reynolds number < 13172.75                       |
|  |  |  |  | Reynolds number < 5291.54 : 0.07 (3/0) [2/0]     |
|  |  |  |  | Reynolds number >= 5291.54                       |
|  |  |  |  | Reynolds number < 7592.67 : 0.07 (2/0) [1/0]     |
|  |  |  |  | Reynolds number >= 7592.67 : 0.06 (4/0) [1/0]    |
|  |  |  |  | Reynolds number >= 13172.75 : 0.06 (53/0) [32/0] |
|  |  |  |  | Relative roughness >= 0.04                       |
|  |  |  |  | Relative roughness < 0.04                        |
|  |  |  |  | Reynolds number < 12520.47                       |
|  |  |  |  | Reynolds number < 5064.06 : 0.07 (3/0) [1/0]     |
|  |  |  |  | Reynolds number >= 5064.06 : 0.07 (8/0) [0/0]    |
|  |  |  |  | Reynolds number >= 12520.47 : 0.07 (54/0) [23/0] |
|  |  |  |  | Relative roughness >= 0.04                       |

---



|  |  |  |  |                                                  |
|--|--|--|--|--------------------------------------------------|
|  |  |  |  | Relative roughness < 0.05                        |
|  |  |  |  | Reynolds number < 12038.11                       |
|  |  |  |  | Reynolds number < 7065.54 : 0.07 (5/0) [1/0]     |
|  |  |  |  | Reynolds number >= 7065.54 : 0.07 (3/0) [1/0]    |
|  |  |  |  | Reynolds number >= 12038.11 : 0.07 (46/0) [28/0] |
|  |  |  |  | Relative roughness >= 0.05                       |
|  |  |  |  | Reynolds number < 11356.95                       |
|  |  |  |  | Reynolds number < 4819.34 : 0.08 (3/0) [0/0]     |
|  |  |  |  | Reynolds number >= 4819.34                       |
|  |  |  |  | Reynolds number < 6277.54 : 0.08 (2/0) [0/0]     |
|  |  |  |  | Reynolds number >= 6277.54 : 0.07 (3/0) [3/0]    |
|  |  |  |  | Reynolds number >= 11356.95 : 0.07 (63/0) [30/0] |

**Table S2.** M5 pruned model tree of approach-2

| Distribution of M5 pruned model tree                    |
|---------------------------------------------------------|
| M5 pruned model tree:<br>(using smoothed linear models) |
| Relative roughness <= 0.007 :                           |
| Relative roughness <= 0.001 :                           |
| Relative roughness <= 0 :                               |
| Reynolds number <= 790424.289 :                         |
| Reynolds number <= 255009.008 : LM1 (28/2.995%)         |
| Reynolds number > 255009.008 : LM2 (41/4.368%)          |
| Reynolds number > 790424.289 :                          |
| Relative roughness <= 0 :                               |
| Reynolds number <= 4088746.049 : LM3 (45/3.876%)        |
| Reynolds number > 4088746.049 : LM4 (96/2.815%)         |
| Relative roughness > 0 : LM5 (113/4.193%)               |
| Relative roughness > 0 :                                |
| Reynolds number <= 101067.362 :                         |
| Reynolds number <= 30658.063 :                          |
| Reynolds number <= 17201.565 : LM6 (15/2.34%)           |
| Reynolds number > 17201.565 : LM7 (25/2.873%)           |
| Reynolds number > 30658.063 : LM8 (57/1.714%)           |
| Reynolds number > 101067.362 :                          |
| Relative roughness <= 0.001 :                           |
| Reynolds number <= 435586.165 : LM9 (34/3.607%)         |
| Reynolds number > 435586.165 : LM10 (125/2.214%)        |
| Relative roughness > 0.001 : LM11 (139/4.751%)          |
| Relative roughness > 0.001 :                            |
| Reynolds number <= 20778.144 :                          |
| Reynolds number <= 7207.125 :                           |
| Reynolds number <= 3828.229 : LM12 (15/1.913%)          |
| Reynolds number > 3828.229 : LM13 (31/2.513%)           |
| Reynolds number > 7207.125 : LM14 (62/2.569%)           |
| Reynolds number > 20778.144 :                           |
| Relative roughness <= 0.003 :                           |

---

- | | | | Reynolds number  $\leq 110125.597$  : LM15 (46/2.884%)
- | | | | Reynolds number  $> 110125.597$  : LM16 (179/2.352%)
- | | | Relative roughness  $> 0.003$  :
- | | | | Relative roughness  $\leq 0.005$  :
- | | | | | Relative roughness  $\leq 0.004$  :
- | | | | | | Reynolds number  $\leq 454730.133$  :
- | | | | | | | Reynolds number  $\leq 56788.997$  : LM17 (10/4.434%)
- | | | | | | | Reynolds number  $> 56788.997$  : LM18 (16/2.685%)
- | | | | | | | Reynolds number  $> 454730.133$  : LM19 (43/0.199%)
- | | | | | Relative roughness  $> 0.004$  :
- | | | | | | Reynolds number  $\leq 332250.608$  :
- | | | | | | | Reynolds number  $\leq 62281.379$  : LM20 (8/3.988%)
- | | | | | | | Reynolds number  $> 62281.379$  : LM21 (12/1.928%)
- | | | | | | | Reynolds number  $> 332250.608$  : LM22 (46/0.481%)
- | | | | Relative roughness  $> 0.005$  : LM23 (58/3.651%)
- Relative roughness  $> 0.007$  :
- | Relative roughness  $\leq 0.028$  :
- | | Relative roughness  $\leq 0.016$  :
- | | | Reynolds number  $\leq 24672.88$  :
- | | | | Reynolds number  $\leq 5456.871$  : LM24 (22/1.509%)
- | | | | Reynolds number  $> 5456.871$  :
- | | | | | Relative roughness  $\leq 0.011$  :
- | | | | | | Reynolds number  $\leq 10657.838$  : LM25 (12/1.765%)
- | | | | | | Reynolds number  $> 10657.838$  : LM26 (12/0.928%)
- | | | | | Relative roughness  $> 0.011$  : LM27 (24/2.597%)
- | | | | Reynolds number  $> 24672.88$  : LM28 (276/2.47%)
- | | Relative roughness  $> 0.016$  :
- | | | Relative roughness  $\leq 0.022$  :
- | | | | Reynolds number  $\leq 28085.606$  :
- | | | | | Reynolds number  $\leq 6766.529$  : LM29 (14/5.638%)
- | | | | | Reynolds number  $> 6766.529$  : LM30 (25/1.842%)
- | | | | | Reynolds number  $> 28085.606$  : LM31 (146/1.448%)
- | | | | Relative roughness  $> 0.022$  :
- | | | | | Reynolds number  $\leq 425021.348$  :
- | | | | | | Reynolds number  $\leq 13960.456$  : LM32 (9/2.554%)
- | | | | | | Reynolds number  $> 13960.456$  : LM33 (27/2.859%)
- | | | | | Reynolds number  $> 425021.348$  : LM34 (50/0%)
- | | Relative roughness  $> 0.028$  :
- | | | Relative roughness  $\leq 0.042$  :
- | | | | Relative roughness  $\leq 0.033$  :
- | | | | | Reynolds number  $\leq 80954.297$  :
- | | | | | | Reynolds number  $\leq 13252.94$  : LM35 (13/3.543%)
- | | | | | | Reynolds number  $> 13252.94$  : LM36 (14/2.555%)
- | | | | | | Reynolds number  $> 80954.297$  : LM37 (69/0.632%)
- | | | | | Relative roughness  $> 0.033$  :
- | | | | | | Relative roughness  $\leq 0.038$  :
- | | | | | | | Reynolds number  $\leq 169691.179$  :
- | | | | | | | Reynolds number  $\leq 15112.582$  : LM38 (14/4.104%)
- | | | | | | | Reynolds number  $> 15112.582$  : LM39 (18/1.96%)
- | | | | | | | Reynolds number  $> 169691.179$  : LM40 (66/0.41%)
- | | | | | Relative roughness  $> 0.038$  :

---

---

| | | | | Reynolds number  $\leq 46864.458$  :  
 | | | | | Reynolds number  $\leq 7338.182$  : LM41 (7/1.623%)  
 | | | | | Reynolds number  $> 7338.182$  : LM42 (15/4.351%)  
 | | | | | Reynolds number  $> 46864.458$  : LM43 (67/0.674%)  
 | | Relative roughness  $> 0.042$  :  
 | | | Relative roughness  $\leq 0.048$  :  
 | | | | Reynolds number  $\leq 39246.24$  :  
 | | | | Reynolds number  $\leq 10687.392$  : LM44 (9/1.129%)  
 | | | | Reynolds number  $> 10687.392$  : LM45 (10/1.379%)  
 | | | | Reynolds number  $> 39246.24$  : LM46 (65/1.07%)  
 | | | Relative roughness  $> 0.048$  :  
 | | | | Reynolds number  $\leq 44980.031$  :  
 | | | | Reynolds number  $\leq 9489.592$  : LM47 (9/1.978%)  
 | | | | Reynolds number  $> 9489.592$  : LM48 (14/2.746%)  
 | | | | Reynolds number  $> 44980.031$  : LM49 (81/0.889%)

---

**Table S3.** M5 pruned model tree equations of approach-2.

| Expression for approach-2 |                                                                                                              |                                                                                                               |
|---------------------------|--------------------------------------------------------------------------------------------------------------|---------------------------------------------------------------------------------------------------------------|
| Rules<br>Expression       | M num: 1<br>friction factor =<br>$8.3034 * \text{Relative roughness} - 0 * \text{Reynolds number} + 0.0186$  | LM num: 11<br>friction factor =<br>$1.464 * \text{Relative roughness} - 0 * \text{Reynolds number} + 0.0179$  |
| Rules<br>Expression       | LM num: 2<br>friction factor =<br>$8.3034 * \text{Relative roughness} - 0 * \text{Reynolds number} + 0.0145$ | LM num: 12<br>friction factor =<br>$1.1322 * \text{Relative roughness} - 0 * \text{Reynolds number} + 0.0466$ |
| Rules<br>Expression       | LM num: 3<br>friction factor =<br>$5.9166 * \text{Relative roughness} - 0 * \text{Reynolds number} + 0.0109$ | LM num: 13<br>friction factor =<br>$1.2658 * \text{Relative roughness} - 0 * \text{Reynolds number} + 0.0424$ |
| Rules<br>Expression       | LM num: 4<br>friction factor =<br>$5.9166 * \text{Relative roughness} - 0 * \text{Reynolds number} + 0.0097$ | LM num: 14<br>friction factor =<br>$1.5708 * \text{Relative roughness} - 0 * \text{Reynolds number} + 0.0348$ |

---

|                     |                                                                                                        |                                                                                                     |
|---------------------|--------------------------------------------------------------------------------------------------------|-----------------------------------------------------------------------------------------------------|
| Rules<br>Expression | LM num: 5<br>friction factor =<br>6.5466 * Relative<br>roughness<br>- 0 * Reynolds number<br>+ 0.0118  | LM num: 15<br>friction factor =<br>2.6046 * Relative roughness<br>- 0 * Reynolds number<br>+ 0.023  |
| Rules<br>Expression | LM num: 6<br>friction factor =<br>2.0093 * Relative<br>roughness<br>- 0 * Reynolds number<br>+ 0.0307  | LM num: 16<br>friction factor =<br>3.4905 * Relative roughness<br>- 0 * Reynolds number<br>+ 0.0171 |
| Rules<br>Expression | LM num: 7<br>friction factor =<br>2.0093 * Relative<br>roughness<br>- 0 * Reynolds number<br>+ 0.0288  | LM num: 17<br>friction factor =<br>0.7937 * Relative roughness<br>- 0 * Reynolds number<br>+ 0.026  |
| Rules<br>Expression | LM num: 8<br>friction factor =<br>4.0169 * Relative<br>roughness<br>- 0 * Reynolds number<br>+ 0.0234  | LM num: 18<br>friction factor =<br>0.7937 * Relative roughness<br>- 0 * Reynolds number<br>+ 0.0254 |
| Rules<br>Expression | LM num: 9<br>friction factor =<br>3.6508 * Relative<br>roughness<br>- 0 * Reynolds number<br>+ 0.0173  | LM num: 19<br>friction factor =<br>0.7937 * Relative roughness<br>- 0 * Reynolds number<br>+ 0.0245 |
| Rules<br>Expression | LM num: 10<br>friction factor =<br>9.4025 * Relative<br>roughness<br>- 0 * Reynolds number<br>+ 0.0129 | LM num: 20<br>friction factor =<br>0.8044 * Relative roughness<br>- 0 * Reynolds number<br>+ 0.027  |
| Rules<br>Expression | LM num: 21<br>friction factor =<br>0.8044 * Relative<br>roughness<br>- 0 * Reynolds number<br>+ 0.0267 | LM num: 31<br>friction factor =<br>0.9727 * Relative roughness<br>- 0 * Reynolds number<br>+ 0.0297 |

|                     |                                                                                                        |                                                                                                     |
|---------------------|--------------------------------------------------------------------------------------------------------|-----------------------------------------------------------------------------------------------------|
| Rules<br>Expression | LM num: 22<br>friction factor =<br>0.8044 * Relative<br>roughness<br>- 0 * Reynolds number<br>+ 0.0259 | LM num: 32<br>friction factor =<br>0.2 * Relative roughness<br>- 0 * Reynolds number<br>+ 0.0515    |
| Rules<br>Expression | LM num: 23<br>friction factor =<br>0.671 * Relative<br>roughness<br>- 0 * Reynolds number<br>+ 0.029   | LM num: 33<br>friction factor =<br>0.2 * Relative roughness<br>- 0 * Reynolds number<br>+ 0.0494    |
| Rules<br>Expression | LM num: 24<br>friction factor =<br>0.8967 * Relative<br>roughness<br>- 0 * Reynolds number<br>+ 0.0422 | LM num: 34<br>friction factor =<br>0.2 * Relative roughness<br>- 0 * Reynolds number<br>+ 0.0486    |
| Rules<br>Expression | LM num: 25<br>friction factor =<br>1.0911 * Relative<br>roughness<br>- 0 * Reynolds number<br>+ 0.0359 | LM num: 35<br>friction factor =<br>0.1651 * Relative roughness<br>- 0 * Reynolds number<br>+ 0.0564 |
| Rules<br>Expression | LM num: 26<br>friction factor =<br>1.0998 * Relative<br>roughness<br>- 0 * Reynolds number<br>+ 0.035  | LM num: 36<br>friction factor =<br>0.1651 * Relative roughness<br>- 0 * Reynolds number<br>+ 0.0544 |
| Rules<br>Expression | LM num: 27<br>friction factor =<br>0.969 * Relative<br>roughness<br>- 0 * Reynolds number<br>+ 0.0361  | LM num: 37<br>friction factor =<br>0.1651 * Relative roughness<br>- 0 * Reynolds number<br>+ 0.0527 |
| Rules<br>Expression | LM num: 28<br>friction factor =<br>1.1573 * Relative<br>roughness<br>- 0 * Reynolds number<br>+ 0.0268 | LM num: 38<br>friction factor =<br>0.2048 * Relative roughness<br>- 0 * Reynolds number<br>+ 0.0575 |

|                     |                                                                                                        |                                                                                                     |
|---------------------|--------------------------------------------------------------------------------------------------------|-----------------------------------------------------------------------------------------------------|
| Rules<br>Expression | LM num: 29<br>friction factor =<br>0.6688 * Relative<br>roughness<br>- 0 * Reynolds number<br>+ 0.0426 | LM num: 39<br>friction factor =<br>0.2048 * Relative roughness<br>- 0 * Reynolds number<br>+ 0.0556 |
| Rules<br>Expression | LM num: 30<br>friction factor =<br>0.9175 * Relative<br>roughness<br>- 0 * Reynolds number<br>+ 0.035  | LM num: 40<br>friction factor =<br>0.2048 * Relative roughness<br>- 0 * Reynolds number<br>+ 0.0544 |
| Rules<br>Expression | LM num: 46<br>friction factor =<br>0.1766 * Relative<br>roughness<br>- 0 * Reynolds number<br>+ 0.0609 | LM num: 41<br>friction factor =<br>0.2118 * Relative roughness<br>- 0 * Reynolds number<br>+ 0.0598 |
| Rules<br>Expression | LM num: 47<br>friction factor =<br>0.1621 * Relative<br>roughness<br>- 0 * Reynolds number<br>+ 0.0668 | LM num: 42<br>friction factor =<br>0.2118 * Relative roughness<br>- 0 * Reynolds number<br>+ 0.0583 |
| Rules<br>Expression | LM num: 48<br>friction factor =<br>0.1621 * Relative<br>roughness<br>- 0 * Reynolds number<br>+ 0.0654 | LM num: 43<br>friction factor =<br>0.2118 * Relative roughness<br>- 0 * Reynolds number<br>+ 0.0568 |
| Rules<br>Expression | LM num: 49<br>friction factor =<br>0.1621 * Relative<br>roughness<br>- 0 * Reynolds number<br>+ 0.064  | LM num: 44<br>friction factor =<br>0.1766 * Relative roughness<br>- 0 * Reynolds number<br>+ 0.0634 |
| Rules<br>Expression |                                                                                                        | LM num: 45<br>friction factor =<br>0.1766 * Relative roughness<br>- 0 * Reynolds number<br>+ 0.0624 |

**Table S4.** M5Rules model rules of approach-2.

| Expression for approach-2 |                              |                   |                              |
|---------------------------|------------------------------|-------------------|------------------------------|
| Rules                     | Expression                   | Rules             | Expression                   |
| Rule: 1                   |                              | Rule: 6           |                              |
| IF                        |                              | IF                |                              |
|                           | Relative roughness > 0.007   |                   | Relative roughness <= 0.009  |
|                           | Relative roughness <= 0.028  |                   | Relative roughness <= 0.001  |
|                           | Relative roughness <= 0.016  |                   | Reynolds number > 145612.536 |
|                           | Reynolds number > 24672.88   |                   | Relative roughness <= 0      |
| THEN                      |                              |                   | Reynolds number > 360716.151 |
|                           |                              | THEN              |                              |
| friction factor =         |                              | friction factor = |                              |
|                           | 1.1573 * Relative roughness  |                   | 1.7865 * Relative roughness  |
|                           | - 0 * Reynolds number        |                   | - 0 * Reynolds number        |
|                           | + 0.0268 [276/2.47%]         |                   | + 0.0143 [119/4.565%]        |
| Rule: 2                   |                              | Rule: 7           |                              |
| IF                        |                              | IF                |                              |
|                           | Relative roughness <= 0.007  |                   | Relative roughness > 0.009   |
|                           | Relative roughness > 0.001   |                   | Relative roughness > 0.038   |
|                           | Reynolds number > 20778.144  |                   | Relative roughness > 0.048   |
|                           | Relative roughness <= 0.003  |                   | Reynolds number > 44980.031  |
|                           | Reynolds number > 110125.597 |                   |                              |
| THEN                      |                              | THEN              |                              |
|                           |                              |                   |                              |
| friction factor =         |                              | friction factor = |                              |
|                           | 3.4905 * Relative roughness  |                   | 0.1347 * Relative roughness  |
|                           | - 0 * Reynolds number        |                   | - 0 * Reynolds number        |
|                           | + 0.0171 [179/2.217%]        |                   | + 0.0653 [81/0.909%]         |
| Rule: 3                   |                              | Rule: 8           |                              |
| IF                        |                              | IF                |                              |
|                           | Relative roughness > 0.007   |                   | Relative roughness > 0.009   |
|                           | Relative roughness <= 0.033  |                   | Relative roughness <= 0.033  |
|                           | Relative roughness <= 0.022  |                   | Relative roughness > 0.028   |
|                           | Reynolds number > 24578.467  |                   | Reynolds number > 80954.297  |
| THEN                      |                              | THEN              |                              |
|                           |                              |                   |                              |
| friction factor =         |                              | friction factor = |                              |
|                           | 0.922 * Relative roughness   |                   | 0.1373 * Relative roughness  |
|                           | - 0 * Reynolds number        |                   | - 0 * Reynolds number        |
|                           | + 0.0307 [148/1.539%]        |                   | + 0.0535 [69/0.673%]         |
| Rule: 4                   |                              | Rule: 9           |                              |
| IF                        |                              | IF                |                              |
|                           | Relative roughness <= 0.007  |                   | Relative roughness > 0.009   |
|                           | Relative roughness <= 0.001  |                   | Relative roughness > 0.028   |
|                           | Relative roughness > 0       |                   | Relative roughness <= 0.042  |
|                           | Reynolds number > 101067.362 |                   | Relative roughness > 0.038   |
|                           | Relative roughness > 0.001   |                   | Reynolds number > 46864.458  |

|                                                                                                                                                                                                                                                                                                                                                                                                                                                                                                                                                                                                                                                                                                                                                                                                                                                                                                                                                                                                                                                                                                                                                                                                                                                                                                                                                                                                                                                                                                                                                                                                         |                                                                                                                                                                                                                                                                                                                                                                                                                                                                                                                                                                                                                                                                                                                                                                                                                                                                                                                                                                                                                                                                                                                                                                                                                                                                                                                                                                                                                                                                                                                                                                                                              |
|---------------------------------------------------------------------------------------------------------------------------------------------------------------------------------------------------------------------------------------------------------------------------------------------------------------------------------------------------------------------------------------------------------------------------------------------------------------------------------------------------------------------------------------------------------------------------------------------------------------------------------------------------------------------------------------------------------------------------------------------------------------------------------------------------------------------------------------------------------------------------------------------------------------------------------------------------------------------------------------------------------------------------------------------------------------------------------------------------------------------------------------------------------------------------------------------------------------------------------------------------------------------------------------------------------------------------------------------------------------------------------------------------------------------------------------------------------------------------------------------------------------------------------------------------------------------------------------------------------|--------------------------------------------------------------------------------------------------------------------------------------------------------------------------------------------------------------------------------------------------------------------------------------------------------------------------------------------------------------------------------------------------------------------------------------------------------------------------------------------------------------------------------------------------------------------------------------------------------------------------------------------------------------------------------------------------------------------------------------------------------------------------------------------------------------------------------------------------------------------------------------------------------------------------------------------------------------------------------------------------------------------------------------------------------------------------------------------------------------------------------------------------------------------------------------------------------------------------------------------------------------------------------------------------------------------------------------------------------------------------------------------------------------------------------------------------------------------------------------------------------------------------------------------------------------------------------------------------------------|
| <p>THEN</p> <p>friction factor =<br/> <math>1.4629 * \text{Relative roughness}</math><br/> <math>- 0 * \text{Reynolds number}</math><br/> <math>+ 0.0179 [139/4.251\%]</math></p> <p>Rule: 5</p> <p>IF</p> <p>Relative roughness <math>\leq 0.007</math><br/> Relative roughness <math>\leq 0.001</math><br/> Reynolds number <math>&gt; 277567.489</math><br/> Relative roughness <math>\leq 0</math><br/> Reynolds number <math>&gt; 1453170.59</math></p> <p>THEN</p> <p>friction factor =<br/> <math>31.4699 * \text{Relative roughness}</math><br/> <math>- 0 * \text{Reynolds number}</math><br/> <math>+ 0.0096 [231/3.068\%]</math></p> <p>Rule: 11</p> <p>IF</p> <p>Relative roughness <math>\leq 0.007</math><br/> Relative roughness <math>\leq 0.001</math><br/> Reynolds number <math>\leq 110049.882</math><br/> Reynolds number <math>&gt; 35269.947</math></p> <p>THEN</p> <p>friction factor =<br/> <math>4.1374 * \text{Relative roughness}</math><br/> <math>- 0 * \text{Reynolds number}</math><br/> <math>+ 0.0235 [63/1.428\%]</math></p> <p>Rule: 12</p> <p>IF</p> <p>Relative roughness <math>\leq 0.007</math><br/> Relative roughness <math>&gt; 0.001</math><br/> Reynolds number <math>&gt; 12612.735</math><br/> Relative roughness <math>\leq 0.005</math><br/> Reynolds number <math>&gt; 25249.58</math><br/> Relative roughness <math>&gt; 0.004</math></p> <p>THEN</p> <p>friction factor =<br/> <math>0.5236 * \text{Relative roughness}</math><br/> <math>- 0 * \text{Reynolds number}</math><br/> <math>+ 0.0274 [64/4.491\%]</math></p> <p>Rule: 13</p> <p>IF</p> | <p>THEN</p> <p>friction factor =<br/> <math>0.1774 * \text{Relative roughness}</math><br/> <math>- 0 * \text{Reynolds number}</math><br/> <math>+ 0.0582 [67/0.709\%]</math></p> <p>Rule: 10</p> <p>IF</p> <p>Relative roughness <math>&gt; 0.007</math><br/> Relative roughness <math>&gt; 0.028</math><br/> Relative roughness <math>\leq 0.038</math><br/> Reynolds number <math>&gt; 169691.179</math></p> <p>THEN</p> <p>friction factor =<br/> <math>0.1966 * \text{Relative roughness}</math><br/> <math>- 0 * \text{Reynolds number}</math><br/> <math>+ 0.0547 [66/0.44\%]</math></p> <p>Rule: 16</p> <p>IF</p> <p>Relative roughness <math>\leq 0.007</math><br/> Reynolds number <math>\leq 13244.206</math><br/> Reynolds number <math>&gt; 7207.125</math></p> <p>THEN</p> <p>friction factor =<br/> <math>1.4437 * \text{Relative roughness}</math><br/> <math>- 0 * \text{Reynolds number}</math><br/> <math>+ 0.0377 [45/1.617\%]</math></p> <p>Rule: 17</p> <p>IF</p> <p>Relative roughness <math>\leq 0.007</math><br/> Relative roughness <math>\leq 0.001</math><br/> Reynolds number <math>&gt; 72609.962</math><br/> Reynolds number <math>&gt; 1604846.936</math></p> <p>THEN</p> <p>friction factor =<br/> <math>0.7192 * \text{Relative roughness}</math><br/> <math>- 0 * \text{Reynolds number}</math><br/> <math>+ 0.0181 [43/0.285\%]</math></p> <p>Rule: 18</p> <p>IF</p> <p>Relative roughness <math>\leq 0.007</math><br/> Reynolds number <math>&gt; 16584.458</math><br/> Relative roughness <math>&gt; 0.004</math><br/> Reynolds number <math>&gt; 228578.181</math></p> |
|---------------------------------------------------------------------------------------------------------------------------------------------------------------------------------------------------------------------------------------------------------------------------------------------------------------------------------------------------------------------------------------------------------------------------------------------------------------------------------------------------------------------------------------------------------------------------------------------------------------------------------------------------------------------------------------------------------------------------------------------------------------------------------------------------------------------------------------------------------------------------------------------------------------------------------------------------------------------------------------------------------------------------------------------------------------------------------------------------------------------------------------------------------------------------------------------------------------------------------------------------------------------------------------------------------------------------------------------------------------------------------------------------------------------------------------------------------------------------------------------------------------------------------------------------------------------------------------------------------|--------------------------------------------------------------------------------------------------------------------------------------------------------------------------------------------------------------------------------------------------------------------------------------------------------------------------------------------------------------------------------------------------------------------------------------------------------------------------------------------------------------------------------------------------------------------------------------------------------------------------------------------------------------------------------------------------------------------------------------------------------------------------------------------------------------------------------------------------------------------------------------------------------------------------------------------------------------------------------------------------------------------------------------------------------------------------------------------------------------------------------------------------------------------------------------------------------------------------------------------------------------------------------------------------------------------------------------------------------------------------------------------------------------------------------------------------------------------------------------------------------------------------------------------------------------------------------------------------------------|



|                                                                                                                                                                                                                                                                                                                                                                                                                                                                                                                                                                                                                                                                                                                                                                                                                                                                                                                                                                                                                                                                                                                                                                                                                        |                                                                                                                                                                                                                                                                                                                                                                                                                                                                                                                                                                                                                                                                                                                                                                                                                                                                                                                                                                                                                                                                                                                                                                                                                             |
|------------------------------------------------------------------------------------------------------------------------------------------------------------------------------------------------------------------------------------------------------------------------------------------------------------------------------------------------------------------------------------------------------------------------------------------------------------------------------------------------------------------------------------------------------------------------------------------------------------------------------------------------------------------------------------------------------------------------------------------------------------------------------------------------------------------------------------------------------------------------------------------------------------------------------------------------------------------------------------------------------------------------------------------------------------------------------------------------------------------------------------------------------------------------------------------------------------------------|-----------------------------------------------------------------------------------------------------------------------------------------------------------------------------------------------------------------------------------------------------------------------------------------------------------------------------------------------------------------------------------------------------------------------------------------------------------------------------------------------------------------------------------------------------------------------------------------------------------------------------------------------------------------------------------------------------------------------------------------------------------------------------------------------------------------------------------------------------------------------------------------------------------------------------------------------------------------------------------------------------------------------------------------------------------------------------------------------------------------------------------------------------------------------------------------------------------------------------|
| <p>Relative roughness &gt; 0.007<br/> Relative roughness &gt; 0.028<br/> Relative roughness &gt; 0.038<br/> Reynolds number &gt; 48106.519</p> <p>THEN</p> <p>friction factor =<br/> 0.2467 * Relative roughness<br/> - 0 * Reynolds number<br/> + 0.058 [63/1.035%]</p> <p>Rule: 14</p> <p>IF</p> <p>Relative roughness &gt; 0.007<br/> Relative roughness &lt;= 0.028<br/> Reynolds number &gt; 425021.348</p> <p>THEN</p> <p>friction factor =<br/> 0.2197 * Relative roughness<br/> - 0 * Reynolds number<br/> + 0.0483 [50/0%]</p> <p>Rule: 15</p> <p>IF</p> <p>Relative roughness &lt;= 0.007<br/> Relative roughness &lt;= 0.001<br/> Reynolds number &gt; 118410.343<br/> Reynolds number &lt;= 2722775.132<br/> Reynolds number &gt; 209787.328</p> <p>THEN</p> <p>friction factor =<br/> 1.2377 * Relative roughness<br/> - 0 * Reynolds number<br/> + 0.0174 [47/4.849%]</p> <p>Rule: 21</p> <p>IF</p> <p>Relative roughness &lt;= 0.014<br/> Reynolds number &lt;= 13268.003<br/> Reynolds number &gt; 3875.168<br/> Relative roughness &gt; 0.005</p> <p>THEN</p> <p>friction factor =<br/> 1.0049 * Relative roughness<br/> - 0 * Reynolds number<br/> + 0.0402 [37/3.73%]</p> <p>Rule: 22</p> <p>IF</p> | <p>THEN</p> <p>friction factor =<br/> 0.4669 * Relative roughness<br/> - 0 * Reynolds number<br/> + 0.0302 [43/0.493%]</p> <p>Rule: 19</p> <p>IF</p> <p>Relative roughness &lt;= 0.007<br/> Reynolds number &gt; 15232.855<br/> Reynolds number &lt;= 394112.24<br/> Relative roughness &gt; 0.001<br/> Relative roughness &lt;= 0.003<br/> Reynolds number &gt; 26988.916</p> <p>THEN</p> <p>friction factor =<br/> 2.1073 * Relative roughness<br/> - 0 * Reynolds number<br/> + 0.0252 [44/2.504%]</p> <p>Rule: 20</p> <p>IF</p> <p>Relative roughness &lt;= 0.009<br/> Reynolds number &gt; 13010.198<br/> Reynolds number &gt; 454730.133</p> <p>THEN</p> <p>friction factor =<br/> 0.6883 * Relative roughness<br/> - 0 * Reynolds number<br/> + 0.0256 [43/0.232%]</p> <p>Rule: 26</p> <p>IF</p> <p>Relative roughness &gt; 0.011<br/> Relative roughness &lt;= 0.038<br/> Relative roughness &lt;= 0.022<br/> Reynolds number &gt; 6641.383</p> <p>THEN</p> <p>friction factor =<br/> 0.8441 * Relative roughness<br/> - 0 * Reynolds number<br/> + 0.0383 [38/2.494%]</p> <p>Rule: 27</p> <p>IF</p> <p>Relative roughness &lt;= 0.011<br/> Reynolds number &lt;= 10241.628<br/> Reynolds number &lt;= 3875.168</p> |
|------------------------------------------------------------------------------------------------------------------------------------------------------------------------------------------------------------------------------------------------------------------------------------------------------------------------------------------------------------------------------------------------------------------------------------------------------------------------------------------------------------------------------------------------------------------------------------------------------------------------------------------------------------------------------------------------------------------------------------------------------------------------------------------------------------------------------------------------------------------------------------------------------------------------------------------------------------------------------------------------------------------------------------------------------------------------------------------------------------------------------------------------------------------------------------------------------------------------|-----------------------------------------------------------------------------------------------------------------------------------------------------------------------------------------------------------------------------------------------------------------------------------------------------------------------------------------------------------------------------------------------------------------------------------------------------------------------------------------------------------------------------------------------------------------------------------------------------------------------------------------------------------------------------------------------------------------------------------------------------------------------------------------------------------------------------------------------------------------------------------------------------------------------------------------------------------------------------------------------------------------------------------------------------------------------------------------------------------------------------------------------------------------------------------------------------------------------------|

|                                                                                                                                                                                                                                                                                                                                                                                                                                                                                                                                                                                                                                                                                                                                                                                                                                                                                                                                                                                                                                                                                                                                                                                                               |                                                                                                                                                                                                                                                                                                                                                                                                                                                                                                                                                                                                                                                                                                                                                                                                                                                                                                                                                                                                                                                                                                                                                       |
|---------------------------------------------------------------------------------------------------------------------------------------------------------------------------------------------------------------------------------------------------------------------------------------------------------------------------------------------------------------------------------------------------------------------------------------------------------------------------------------------------------------------------------------------------------------------------------------------------------------------------------------------------------------------------------------------------------------------------------------------------------------------------------------------------------------------------------------------------------------------------------------------------------------------------------------------------------------------------------------------------------------------------------------------------------------------------------------------------------------------------------------------------------------------------------------------------------------|-------------------------------------------------------------------------------------------------------------------------------------------------------------------------------------------------------------------------------------------------------------------------------------------------------------------------------------------------------------------------------------------------------------------------------------------------------------------------------------------------------------------------------------------------------------------------------------------------------------------------------------------------------------------------------------------------------------------------------------------------------------------------------------------------------------------------------------------------------------------------------------------------------------------------------------------------------------------------------------------------------------------------------------------------------------------------------------------------------------------------------------------------------|
| <p>Relative roughness &gt; 0.011<br/> Relative roughness &gt; 0.028<br/> Relative roughness &gt; 0.038<br/> Relative roughness &lt;= 0.048<br/> Reynolds number &gt; 6778.211</p> <p>THEN</p> <p>friction factor =<br/> 0.6954 * Relative roughness<br/> - 0 * Reynolds number<br/> + 0.0408 [31/2.409%]</p> <p>Rule: 23<br/> IF</p> <p>Relative roughness &lt;= 0.009<br/> Reynolds number &gt; 10240.691<br/> Relative roughness &lt;= 0.001<br/> Reynolds number &gt; 72609.962</p> <p>THEN</p> <p>friction factor =<br/> 4.6265 * Relative roughness<br/> - 0 * Reynolds number<br/> + 0.0225 [29/3.271%]</p> <p>Rule: 24<br/> IF</p> <p>Relative roughness &lt;= 0.011<br/> Reynolds number &gt; 10240.691<br/> Relative roughness &lt;= 0.004<br/> Relative roughness &lt;= 0.001</p> <p>THEN</p> <p>friction factor =<br/> 0.8148 * Relative roughness<br/> - 0 * Reynolds number<br/> + 0.0302 [24/2.77%]</p> <p>Rule: 25<br/> IF</p> <p>Relative roughness &gt; 0.011<br/> Relative roughness &lt;= 0.028<br/> Reynolds number &gt; 23325.425</p> <p>THEN</p> <p>friction factor =<br/> 0.3576 * Relative roughness<br/> - 0 * Reynolds number<br/> + 0.0463 [24/2.852%]</p> <p>Rule: 31<br/> IF</p> | <p>THEN</p> <p>friction factor =<br/> 0.9123 * Relative roughness<br/> - 0 * Reynolds number<br/> + 0.0479 [21/2.671%]</p> <p>Rule: 28<br/> IF</p> <p>Relative roughness &lt;= 0.011<br/> Reynolds number &gt; 10241.628<br/> Relative roughness &lt;= 0.004<br/> Reynolds number &lt;= 73638.781<br/> Relative roughness &gt; 0.001<br/> Reynolds number &gt; 18283.072</p> <p>THEN</p> <p>friction factor =<br/> 1.3146 * Relative roughness<br/> - 0 * Reynolds number<br/> + 0.0291 [20/1.935%]</p> <p>Rule: 29<br/> IF</p> <p>Relative roughness &lt;= 0.011<br/> Reynolds number &gt; 10241.628<br/> Relative roughness &lt;= 0.004<br/> Reynolds number &gt; 18844.945</p> <p>THEN</p> <p>friction factor =<br/> 0.7375 * Relative roughness<br/> - 0 * Reynolds number<br/> + 0.0291 [22/2.997%]</p> <p>Rule: 30<br/> IF</p> <p>Relative roughness &lt;= 0.011<br/> Reynolds number &gt; 10241.628</p> <p>THEN</p> <p>friction factor =<br/> 1.1254 * Relative roughness<br/> - 0 * Reynolds number<br/> + 0.0309 [51/5.242%]</p> <p>Rule: 36<br/> IF</p> <p>Relative roughness &gt; 0.038<br/> Relative roughness &gt; 0.045</p> <p>THEN</p> |
|---------------------------------------------------------------------------------------------------------------------------------------------------------------------------------------------------------------------------------------------------------------------------------------------------------------------------------------------------------------------------------------------------------------------------------------------------------------------------------------------------------------------------------------------------------------------------------------------------------------------------------------------------------------------------------------------------------------------------------------------------------------------------------------------------------------------------------------------------------------------------------------------------------------------------------------------------------------------------------------------------------------------------------------------------------------------------------------------------------------------------------------------------------------------------------------------------------------|-------------------------------------------------------------------------------------------------------------------------------------------------------------------------------------------------------------------------------------------------------------------------------------------------------------------------------------------------------------------------------------------------------------------------------------------------------------------------------------------------------------------------------------------------------------------------------------------------------------------------------------------------------------------------------------------------------------------------------------------------------------------------------------------------------------------------------------------------------------------------------------------------------------------------------------------------------------------------------------------------------------------------------------------------------------------------------------------------------------------------------------------------------|

|                                                                                                                                                                                                                                                                                                                                                                                                                                                                                                                                                                                                                                                                                                                                                                                                                                                                                                                                                                                                                                                                                                                                                                                                                                                                                                                |                                                                                                                                                                                                                                                                                                                                                                                                                                                                                                                                                                                                                                                                                                                                                                                                                                                                                                                                             |
|----------------------------------------------------------------------------------------------------------------------------------------------------------------------------------------------------------------------------------------------------------------------------------------------------------------------------------------------------------------------------------------------------------------------------------------------------------------------------------------------------------------------------------------------------------------------------------------------------------------------------------------------------------------------------------------------------------------------------------------------------------------------------------------------------------------------------------------------------------------------------------------------------------------------------------------------------------------------------------------------------------------------------------------------------------------------------------------------------------------------------------------------------------------------------------------------------------------------------------------------------------------------------------------------------------------|---------------------------------------------------------------------------------------------------------------------------------------------------------------------------------------------------------------------------------------------------------------------------------------------------------------------------------------------------------------------------------------------------------------------------------------------------------------------------------------------------------------------------------------------------------------------------------------------------------------------------------------------------------------------------------------------------------------------------------------------------------------------------------------------------------------------------------------------------------------------------------------------------------------------------------------------|
| <p>Relative roughness <math>\leq 0.016</math></p> <p>THEN</p> <p>friction factor =</p> $0.8455 * \text{Relative roughness} - 0 * \text{Reynolds number} + 0.0452 [35/3.841\%]$ <p>Rule: 32</p> <p>IF</p> <p>Relative roughness <math>\leq 0.038</math></p> <p>Relative roughness <math>\leq 0.028</math></p> <p>Reynolds number <math>\leq 8902.62</math></p> <p>THEN</p> <p>friction factor =</p> $0.6984 * \text{Relative roughness} - 0 * \text{Reynolds number} + 0.0444 [20/6.928\%]$ <p>Rule: 33</p> <p>IF</p> <p>Relative roughness <math>\leq 0.038</math></p> <p>Reynolds number <math>\leq 6895.428</math></p> <p>THEN</p> <p>friction factor =</p> $0.7873 * \text{Relative roughness} - 0 * \text{Reynolds number} + 0.0408 [15/5.043\%]$ <p>Rule: 34</p> <p>IF</p> <p>Relative roughness <math>\leq 0.038</math></p> <p>Relative roughness <math>&gt; 0.033</math></p> <p>Reynolds number <math>&gt; 24926.002</math></p> <p>THEN</p> <p>friction factor =</p> $0.4 * \text{Relative roughness} - 0 * \text{Reynolds number} + 0.0492 [15/3.513\%]$ <p>Rule: 35</p> <p>IF</p> <p>Relative roughness <math>&gt; 0.038</math></p> <p>Reynolds number <math>\leq 18280.96</math></p> <p>Relative roughness <math>&gt; 0.042</math></p> <p>Reynolds number <math>\leq 8311.997</math></p> <p>THEN</p> | <p>friction factor =</p> $0.4002 * \text{Relative roughness} - 0 * \text{Reynolds number} + 0.0547 [15/3.06\%]$ <p>Rule: 37</p> <p>IF</p> <p>Relative roughness <math>\leq 0.033</math></p> <p>Relative roughness <math>&gt; 0.028</math></p> <p>Reynolds number <math>&gt; 21200.117</math></p> <p>THEN</p> <p>friction factor =</p> $0.5595 * \text{Relative roughness} - 0 * \text{Reynolds number} + 0.0435 [11/2.732\%]$ <p>Rule: 38</p> <p>IF</p> <p>Relative roughness <math>\leq 0.033</math></p> <p>THEN</p> <p>friction factor =</p> $0.8152 * \text{Relative roughness} - 0 * \text{Reynolds number} + 0.0382 [15/4.379\%]$ <p>Rule: 39</p> <p>IF</p> <p>Relative roughness <math>\leq 0.038</math></p> <p>THEN</p> <p>friction factor =</p> $0.6457 * \text{Relative roughness} - 0 * \text{Reynolds number} + 0.0434 [9/6.067\%]$ <p>Rule: 40</p> <p>friction factor =</p> $-0 * \text{Reynolds number} + 0.0759 [6/19.756\%]$ |
|----------------------------------------------------------------------------------------------------------------------------------------------------------------------------------------------------------------------------------------------------------------------------------------------------------------------------------------------------------------------------------------------------------------------------------------------------------------------------------------------------------------------------------------------------------------------------------------------------------------------------------------------------------------------------------------------------------------------------------------------------------------------------------------------------------------------------------------------------------------------------------------------------------------------------------------------------------------------------------------------------------------------------------------------------------------------------------------------------------------------------------------------------------------------------------------------------------------------------------------------------------------------------------------------------------------|---------------------------------------------------------------------------------------------------------------------------------------------------------------------------------------------------------------------------------------------------------------------------------------------------------------------------------------------------------------------------------------------------------------------------------------------------------------------------------------------------------------------------------------------------------------------------------------------------------------------------------------------------------------------------------------------------------------------------------------------------------------------------------------------------------------------------------------------------------------------------------------------------------------------------------------------|

|                             |  |
|-----------------------------|--|
| friction factor =           |  |
| 0.6173 * Relative roughness |  |
| - 0 * Reynolds number       |  |
| + 0.0463 [14/3.683%]        |  |
